# Supplementary material for: An Improved Melon Reference Genome With Single-Molecule Sequencing Uncovers a Recent Burst of Transposable Elements With Potential Impact on Genes
Source: Front Plant Sci. 2020 Jan 31;10:1815. doi: 10.3389/fpls.2019.01815 (PMC7006604; doi:10.3389/fpls.2019.01815)
Supplement: Supplementary file 8 [file Table_1.xlsx]

## Sheet: Foglio1
Supplementary Table S1. Summary statistics of the assembly process
Step	Analysis Metric	Value
Raw PacBio subreads
	Polymerase Read Bases	21,117,943,421
	Polymerase Reads	2,568,733
	Polymerase Read Length (mean)	8.221
	Polymerase Read N50	15.25
Pre-Assembly
	Genome Length (user input)	360,000,000
	Number of Filtered Subreads	2,375,428
	Filtered Subread Length Mean	8.284
	Filtered Subread Length (N50)	13.987
	Filtered Subread Length 95%	24.271
	Filtered Subread E-size	15.61
	Number of Filtered Subread Bases	19,677,749,544
	Filtered Subread Coverage	54.66
	Length Cutoff (user input or auto-calc)	3.755
	Number of Seed Reads	1,499,406
	Seed Read Length Mean	12.005
	Seed Read Length (N50)	15.131
	Seed Read Length 95%	27.133
	Seed Read E-size	16.844
	Number of Seed Bases (total)	18,000,514,570
	Seed Coverage (bases/genome_size)	50
	Number of Pre-Assembled Reads	1,469,624
	Pre-Assembled Read Length Mean	7.811
	Pre-Assembled Read Length (N50)	10.919
	Pre-Assembled Read Length 95%	20.108
	Pre-Assembled E-size (sum of squares / sum)	12.503
	Number of Pre-Assembled Bases (total)	11,478,733,948
	Pre-Assembled Coverage (bases/genome_size)	32
	Pre-Assembled Yield (bases/seed_bases)	63.80%
	Average Number of Reads That Each Seed Is Broken Into	1258
	Average Number of Bases Lost from Each Seed	2.695
Assembly
	Polished Contigs (number)	1.178
	Maximum Contig Length	5,662,838
	N50 Contig Length	714.129
	Sum of Contig Lengths (Genome size)	357,646,071
	E-size (sum of squares / sum)	1,162,616
